# Supplementary material
Source: PubMed Central journal article supplement (PMC8754500)
Supplement: NIHMS1764912-supplement-Managlia_Supp_fig.pdf [file NIHMS1764912-supplement-Managlia_Supp_fig.pdf]

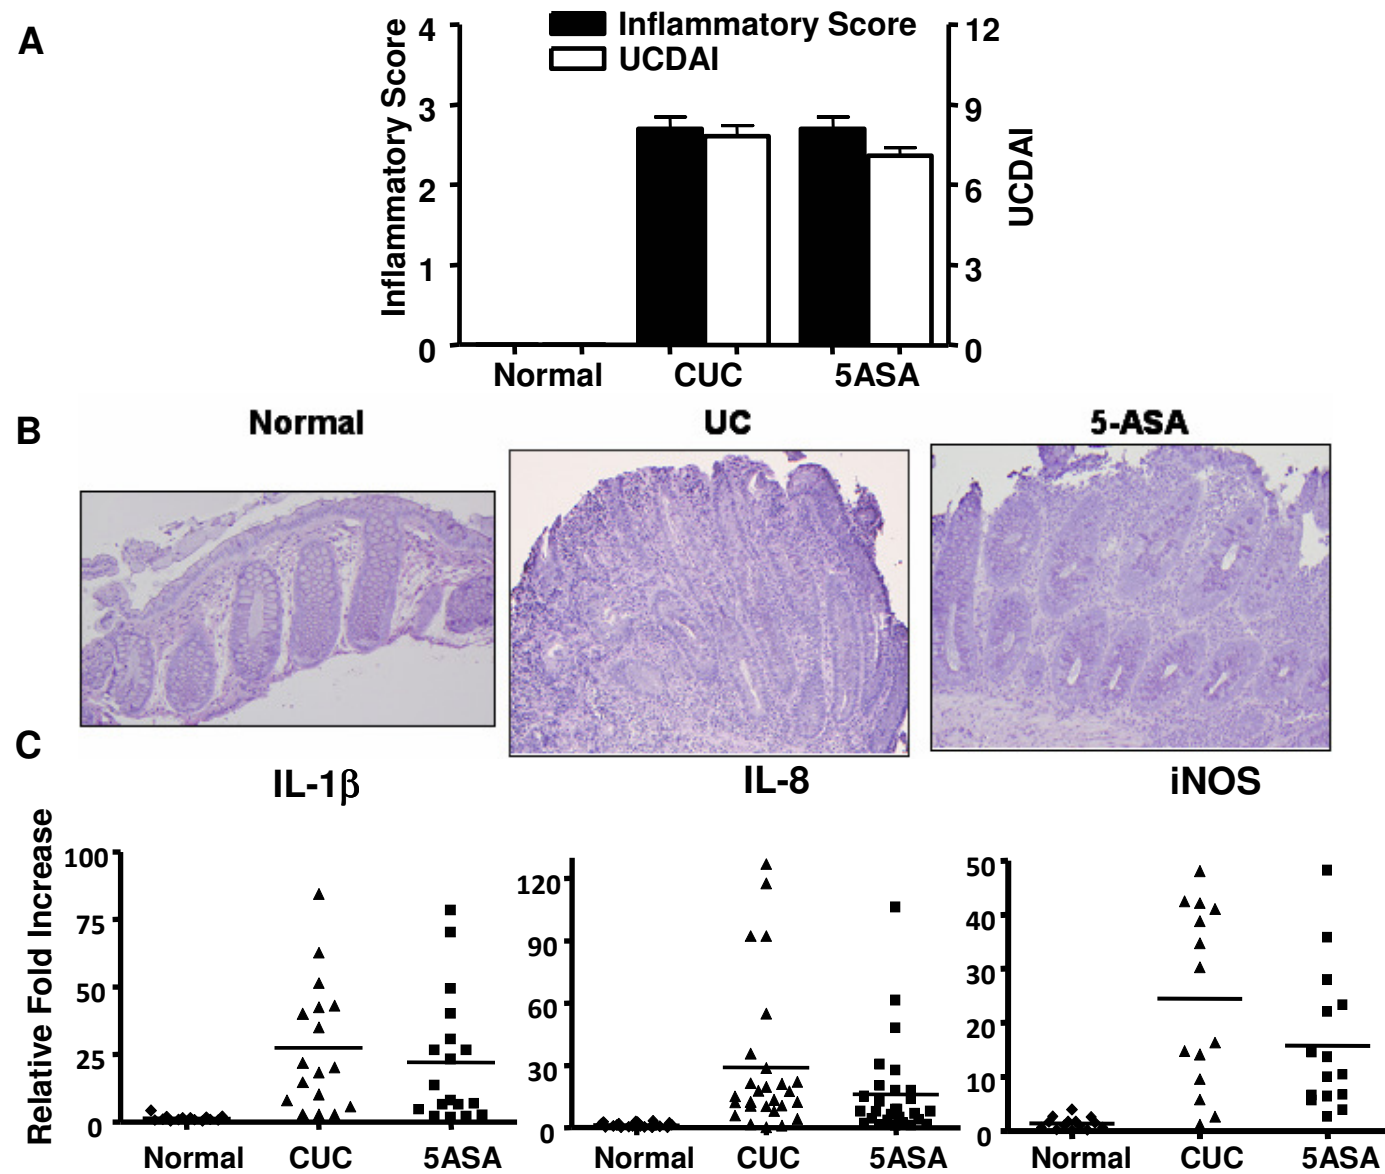

**Supplemental Figure 1. Patients traits included in study.** Colon biopsies were taken during endoscopy and embedded in paraffin or preserved in RNAlater or Allprotect tissue reagents (Qiagen). (A) Graph summarizing both UCDAI and H&E inflammatory scores of the patients utilized in this study. UCDAI and inflammatory scores were at comparative levels of disease activity between the two colitis groups, untreated (CUC) and 5-ASA treated (5ASA) colitis patients. Normal patients establish baseline. (B) Representative H&E staining of colon tissue from normal patients or active CUC patients with or without 5-ASA. (C) Real-time PCR showing similar levels of induction of cytokines IL-1 $\beta$ , IL-8 and iNOS between CUC patients with or without 5-ASA.
